# Supplementary material
Source: HighWire-hosted journal article supplement (https://care.diabetesjournals.org/content/suppl/2011/09/14/dc11-0817)

SUPPLEMENTARY DATA

**Supplementary Table 1:** Comparison of lipids, adipokines and C-reactive protein (CRP) between non-decliners and decliners at 3-months postpartum

|                               | <b>Non-decliners</b> | <b>Decliners</b> |          |
|-------------------------------|----------------------|------------------|----------|
|                               | <b>n=74</b>          | <b>N=92</b>      | <b>p</b> |
| <b>At 3-months postpartum</b> |                      |                  |          |
| LDL (mmol/L)                  | 3.68 [2.97-4.34]     | 3.85 [3.22-4.66] | 0.1262   |
| HDL (mmol/L)                  | 1.29 [1.07-1.51]     | 1.35 [1.18-1.59] | 0.1963   |
| Triglycerides (mmol/L)        | 0.96 [0.73-1.53]     | 1.12 [0.75-1.63] | 0.2645   |
| ApoB (g/L)                    | 0.93 [0.78-1.07]     | 0.96 [0.78-1.13] | 0.2639   |
| ApoB:apoA1                    | 0.62 [0.48-0.76]     | 0.62 [0.51-0.73] | 0.8533   |
| CRP (mg/L)                    | 2.21 [0.98-5.09]     | 2.74 [1.58-4.61] | 0.1213   |
| Leptin (ng/ml)                | 22.4 [11.7-38.8]     | 27.2 [14.5-36.9] | 0.2977   |
| Adiponectin (ug/ml)           | 7.7 [5.8-10.8]       | 8.1 [6.1-9.8]    | 0.9624   |

Data are shown as median followed by interquartile range in parentheses.

P-values refer to differences between the two groups as determined by Kruskal-Wallis test

SUPPLEMENTARY DATA

**Supplementary Table 2: Spearman univariate correlations with the baseline-adjusted change in ISSI-2 between 3- and 12-months postpartum**

|                                                    |  |  |  |  | <b>r</b>     | <b>p</b>          |
|----------------------------------------------------|--|--|--|--|--------------|-------------------|
| <b>Measures at 3-months postpartum</b>             |  |  |  |  |              |                   |
| Sport index                                        |  |  |  |  | 0.08         | 0.35              |
| Leisure-time index                                 |  |  |  |  | 0.01         | 0.91              |
| Waist circumference                                |  |  |  |  | <b>-0.17</b> | <b>0.04</b>       |
| Weight                                             |  |  |  |  | <b>-0.19</b> | <b>0.02</b>       |
| BMI                                                |  |  |  |  | <b>-0.21</b> | <b>0.01</b>       |
| LDL                                                |  |  |  |  | -0.11        | 0.19              |
| HDL                                                |  |  |  |  | -0.06        | 0.45              |
| Triglycerides                                      |  |  |  |  | -0.12        | 0.14              |
| ApoB                                               |  |  |  |  | -0.10        | 0.23              |
| ApoB:apoA1                                         |  |  |  |  | 0            | 0.98              |
| CRP                                                |  |  |  |  | <b>-0.24</b> | <b>0.0031</b>     |
| Leptin                                             |  |  |  |  | <b>-0.21</b> | <b>0.01</b>       |
| Adiponectin                                        |  |  |  |  | 0.08         | 0.35              |
| Matsuda index                                      |  |  |  |  | 0.11         | 0.21              |
| 1/HOMA-IR                                          |  |  |  |  | -0.03        | 0.68              |
| Fasting C-peptide:insulin                          |  |  |  |  | -0.04        | 0.62              |
|                                                    |  |  |  |  |              |                   |
| <b>Changes between 3- and 12-months postpartum</b> |  |  |  |  |              |                   |
| Change in sport index                              |  |  |  |  | 0            | 0.98              |
| Change in leisure-time index                       |  |  |  |  | 0.04         | 0.63              |
| Change in waist                                    |  |  |  |  | -0.09        | 0.30              |
| Change in weight                                   |  |  |  |  | -0.15        | 0.08              |
| Change in BMI                                      |  |  |  |  | -0.15        | 0.08              |
| Change in Matsuda index                            |  |  |  |  | 0.15         | 0.08              |
| Change in 1/HOMA-IR                                |  |  |  |  | <b>0.45</b>  | <b>&lt;0.0001</b> |
| Change in fasting C-peptide:insulin                |  |  |  |  | <b>0.22</b>  | <b>0.0082</b>     |

Bold indicates p<0.05

SUPPLEMENTARY DATA

**Supplementary Table 3: Multiple linear regression analyses of (dependent variable) change in ISSI-2 between 3- and 12-months postpartum**

| Model | Predictor                                                    |  |  |  |  | Estimate | SE    | t     | p       |
|-------|--------------------------------------------------------------|--|--|--|--|----------|-------|-------|---------|
| A     | CRP at 3-months postpartum                                   |  |  |  |  | -3.17730 | 7.03  | -0.45 | 0.6522  |
| B     | Leptin at 3-months postpartum                                |  |  |  |  | -0.03131 | 2.14  | -0.01 | 0.9883  |
| C     | Change in weight between 3- and 12-months                    |  |  |  |  | -8.22970 | 5.19  | -1.58 | 0.1150  |
| D     | Change in Matsuda index between 3- and 12-months             |  |  |  |  | 0.21063  | 4.017 | 0.05  | 0.9582  |
| E     | Change in 1/HOMA-IR between 3- and 12-months                 |  |  |  |  | 227.77   | 41.45 | 5.5   | <0.0001 |
| F     | Change in fasting C-peptide:insulin between 3- and 12-months |  |  |  |  | 6.38085  | 1.968 | 3.24  | 0.0015  |

Each model shows the regression of the indicated variable on (dependent variable) change in ISSI-2 between 3- and 12-months postpartum, after adjustment for age, ethnicity, family history of diabetes, breastfeeding, BMI, and ISSI-2 at 3-months postpartum.

*Sensitivity Analysis:*

To attenuate any effect of extreme observations comprising the upper tail of the distribution of ISSI-2 in the decliners group at 3-months postpartum, we also repeated the multiple linear regression analyses after winsorization, a statistical technique wherein outliers are moved to the 95<sup>th</sup> percentile to limit any excessive effect that they may impose on the results. With the winsorized data, the only significant independent predictors of the change in beta-cell function were again the changes in 1/HOMA-IR (beta=254, t=6.23, p<0.0001) and fasting C-peptide:insulin (beta=7.33, t=3.76, p=0.0002), respectively.

SUPPLEMENTARY DATA

**Supplementary Table 4: Logistic regression analyses of (dependent variable) decline in ISSI-2 between 3- and 12-months postpartum**

| Model | Predictor                                                    |  |  |  |  | Odds Ratio |  | 95% CI        |  | p       |
|-------|--------------------------------------------------------------|--|--|--|--|------------|--|---------------|--|---------|
| A     | Change in waist between 3- and 12-months                     |  |  |  |  | 1.02       |  | [0.97 - 1.06] |  | 0.5326  |
| B     | Change in weight between 3- and 12-months                    |  |  |  |  | 1.07       |  | [0.99 - 1.15] |  | 0.0764  |
| C     | Change in Matsuda index between 3- and 12-months             |  |  |  |  | 0.98       |  | [0.93 - 1.03] |  | 0.3476  |
| D     | Change in 1/HOMA-IR between 3- and 12-months                 |  |  |  |  | 0.13       |  | [0.06 - 0.29] |  | <0.0001 |
| E     | Change in fasting C-peptide:insulin between 3- and 12-months |  |  |  |  | 0.95       |  | [0.91 - 0.98] |  | 0.0018  |

Each model shows the regression of the indicated variable on (dependent variable) decline in ISSI-2 between 3- and 12-months postpartum, after adjustment for age, ethnicity, family history of diabetes, breastfeeding, and BMI at 3-months postpartum.

*Sensitivity Analysis:*

A series of sensitivity analyses were performed to evaluate the robustness of these findings:

- (i) First, to eliminate the effect of small changes in ISSI-2 between 3- and 12-months postpartum that may not reflect true physiologic decline or increase, we repeated the logistic regression analyses after limiting the dataset to the 133 women in whom ISSI-2 either decreased or increased by >10%. In this subgroup, the changes in 1/HOMA-IR (OR=0.10, 95%CI 0.04-0.26, p<0.0001) and fasting C-peptide:insulin (OR=0.95, 95%CI 0.92-0.99, p=0.0057) remained as significant independent predictors of declining beta-cell function.
- (ii) Second, when the logistic regression analyses were restricted to the 100 women with GDM, these two measures again emerged as the only significant independent predictors (1/HOMA-IR: OR=0.14, 95%CI 0.05-0.37, p<0.0001; fasting C-peptide:insulin: OR=0.93, 95%CI 0.89-0.97, p=0.0024).
- (iii) Third, the analyses were repeated in only the 124 women with normal glucose tolerance at 3-months postpartum. Once again, the significant independent predictors of declining beta-cell function were the changes in 1/HOMA-IR (OR=0.09, 95%CI 0.03-0.26, p<0.0001) and fasting C-peptide:insulin (OR=0.94, 95%CI 0.90-0.98, p=0.0044), respectively.

SUPPLEMENTARY DATA

**Supplementary Figure 1: Flow chart describing study population**

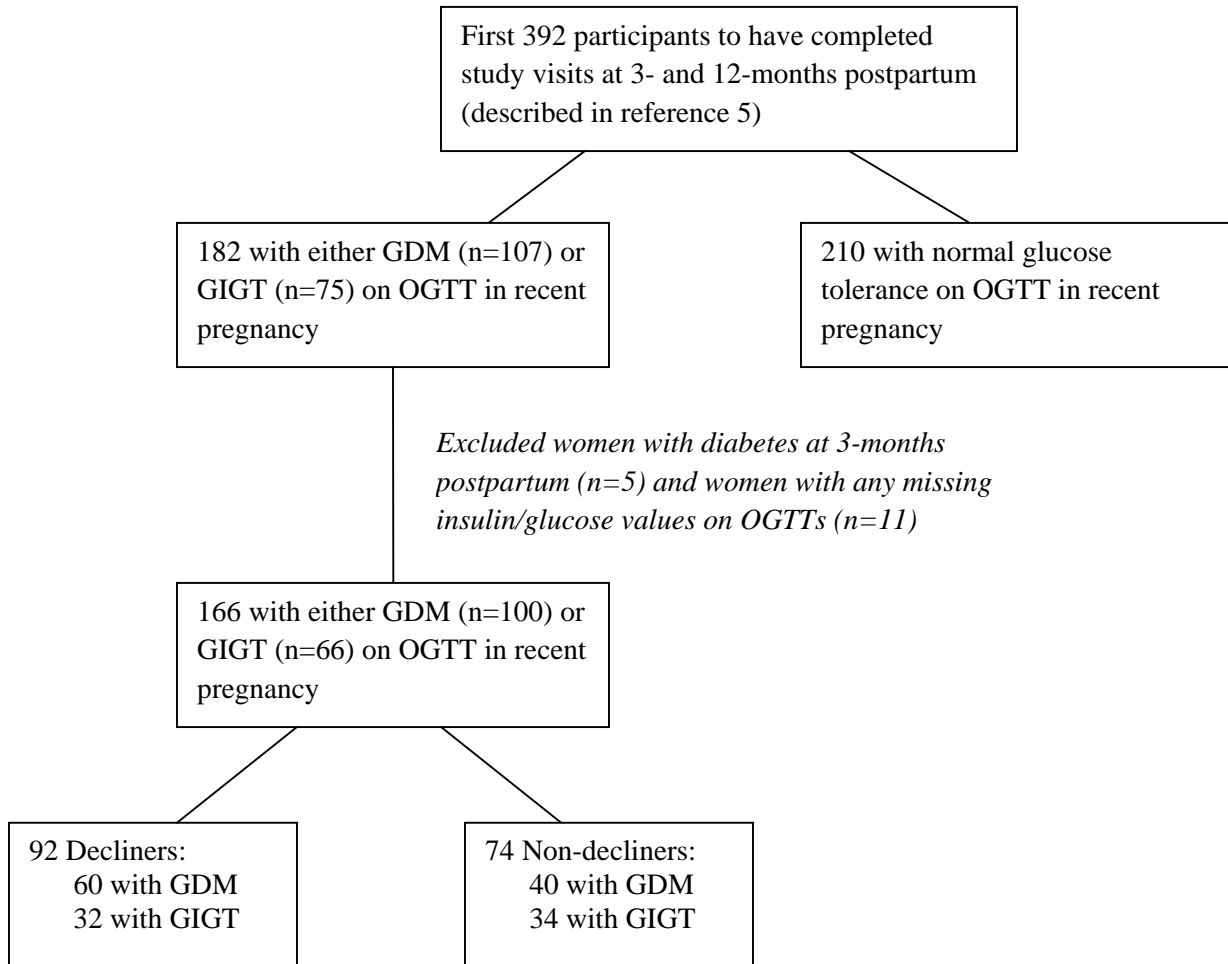

Supplement: DC110817SupplementaryData.pdf [file DC110817SupplementaryData.pdf]
